# Supplementary material for: An analysis of two island groups as potential sites for trials of transgenic mosquitoes for malaria control
Source: PubMed Central journal article supplement (PMC3684749; doi:10.1111/eva.12056), 2013-02-22
Supplement: eva0006-0706-SD1.pdf [file eva0006-0706-SD1.pdf]

**Figure S1:** Sketch of the wing markings of *Anopheles pretoriensis* collected from the Comoros Islands. Markings consistently varied from that described by Gillies and DeMeillon (1968). Specifically, in Comoros specimens the 4<sup>th</sup> pale area (from wing base) of the 1<sup>st</sup> vein is in line with the 4<sup>th</sup> pale spot of costa so that the 2<sup>nd</sup> main dark area has only one pale interruption. In mainland African specimens the 2<sup>nd</sup> main dark area of 1st vein has two pale interruptions. Additionally, the 2<sup>nd</sup> pale area of vein 3 is often absent in Comoros specimens.

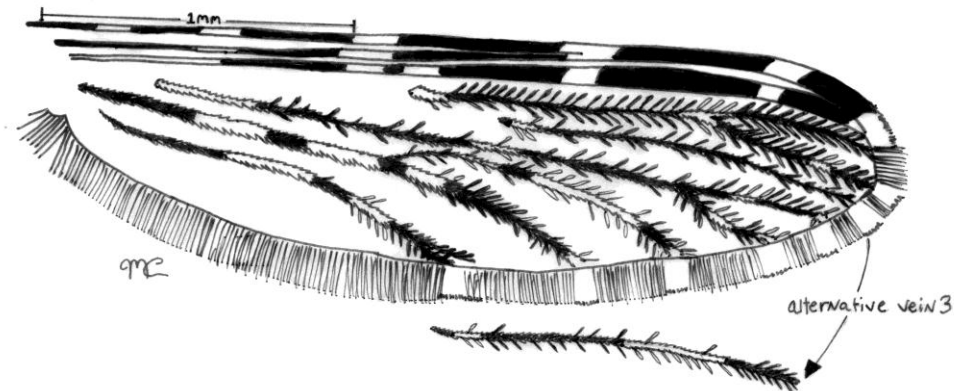

**Figure S2:** Sampling from atypical peridomestic larval habitats on the island of Grande Comore: Top-cisterns (Bouni), Bottom-indoor water drum (Boeindi).

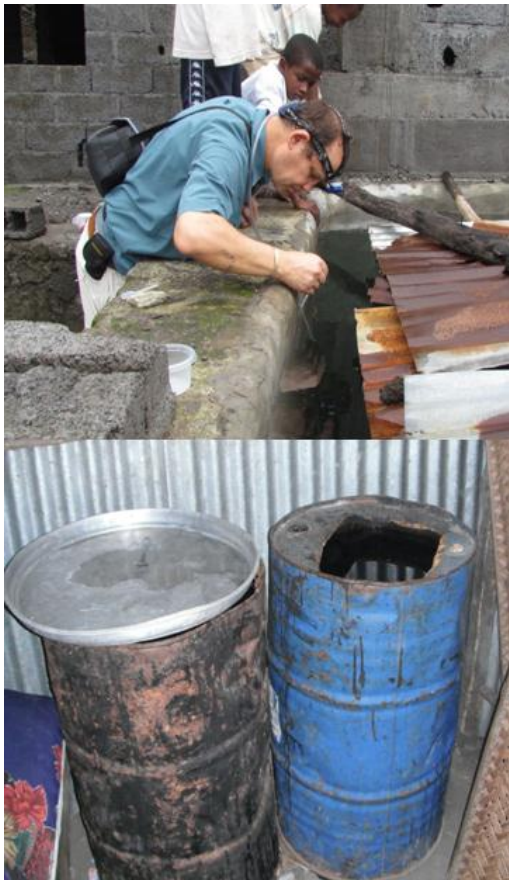

**Figure S3:** Pairwise  $F_{st}$  values for sites within islands (above diagonal) and geographic distances (below the diagonal). Significant values are shown in bold. Site codes correspond with Table 1.

## Grande Comore

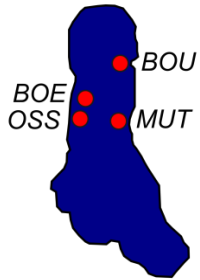

|     | BOE   | BOU          | MUT          | OSS          |
|-----|-------|--------------|--------------|--------------|
| BOE |       | <b>0.044</b> | 0.031        | 0.008        |
| BOU | 15 km |              | <b>0.059</b> | <b>0.071</b> |
| MUT | 12 km | 13 km        |              | 0.052        |
| OSS | 3 km  | 17 km        | 13 km        |              |

## Moheli

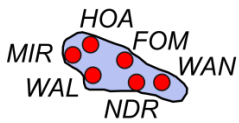

|     | HOA   | FOM   | WAN   | MIR   | WAL   | NDR   |
|-----|-------|-------|-------|-------|-------|-------|
| HOA |       | 0.000 | 0.010 | 0.008 | 0.002 | 0.010 |
| FOM | 7 km  |       | 0.000 | 0.009 | 0.000 | 0.000 |
| WAN | 17 km | 11 km |       | 0.013 | 0.000 | 0.000 |
| MIR | 6 km  | 11 km | 18 km |       | 0.000 | 0.002 |
| WAL | 9 km  | 10 km | 14 km | 5 km  |       | 0.000 |
| NDR | 14 km | 9 km  | 5 km  | 9 km  | 9 km  |       |

**Figure S4:** Mitochondrial ND5 haplotype network based on trimmed length (665 bp) sequences detected in this study combined with published sequences from East Africa (Besansky et al. 1997; Lehmann et al. 1997; Donnelly, Licht, and Lehmann 2001; Donnelly et al. 2004). Circles represent haplotypes and are coloured according to sampling location, and sized proportional to haplotype frequency. Black nodes denote unsampled haplotypes. Haplotype codes are explained in Table S10.

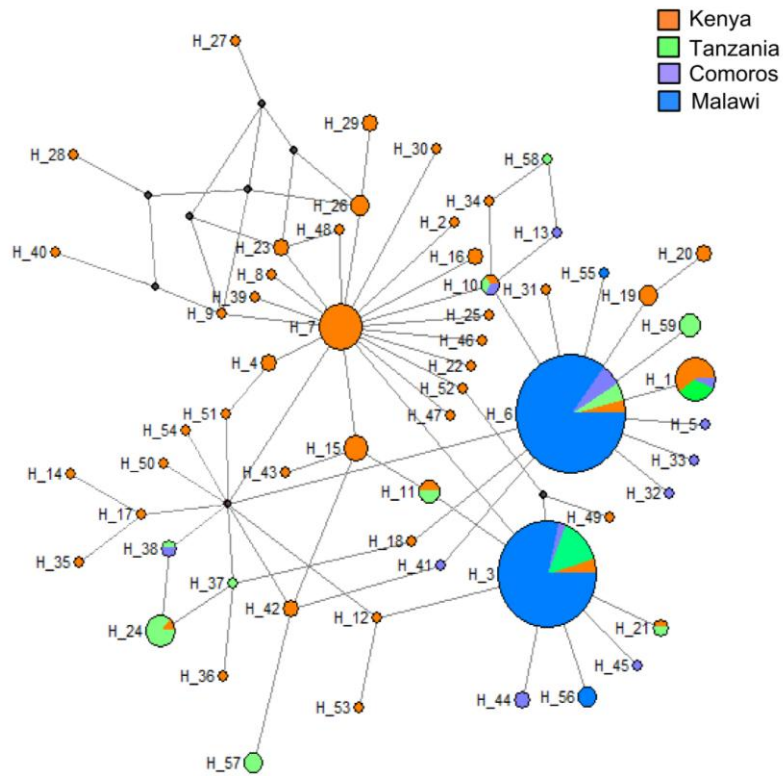

**Figure S5** Elevation map for Grande Comore. Boxed area depicts the southern region which is potentially isolated due to topography.

Figure adapted from Wikimedia Commons File: Grande\_Comore\_topographic\_map-fr'' by Ikonact.

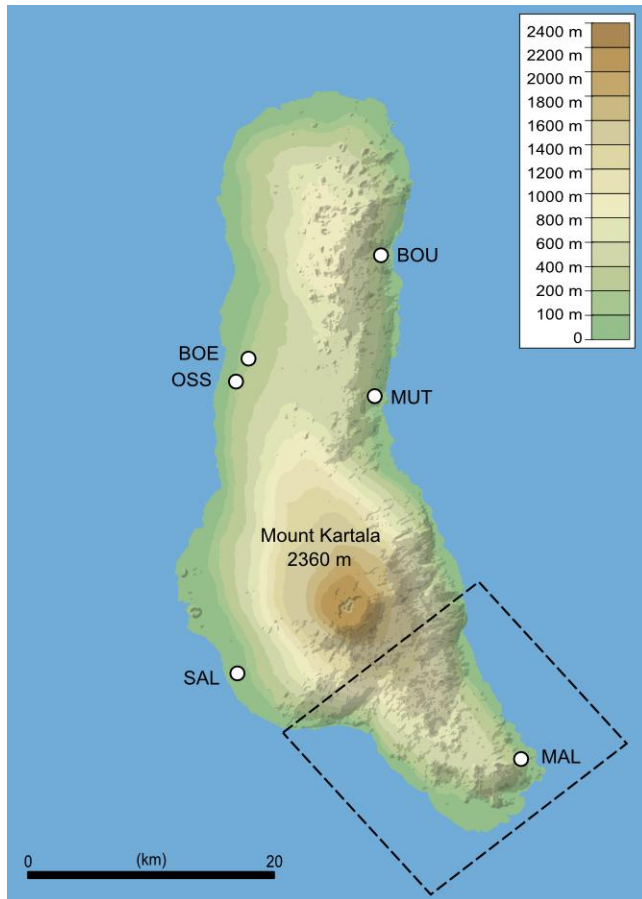

**Anecdotal notes on mosquito species collected in Comoros**

**Table S1.** Location and habitat characteristics of *Anopheles* on the Bijagós archipelago.

| Village and town<br>Location  | <i>Anopheles gambiae</i> s.l. | <i>Anopheles rufipes rufipes</i> | <i>Anopheles funestus</i> | <i>Anopheles pharoensis</i> | Notes                                                       |
|-------------------------------|-------------------------------|----------------------------------|---------------------------|-----------------------------|-------------------------------------------------------------|
| <b>Mainland Guinea Bissau</b> |                               |                                  |                           |                             |                                                             |
| Antula                        | x                             | x                                | x                         | x                           | Resting indoors                                             |
| Prabis                        | x                             | x                                | x                         | x                           | Resting indoors                                             |
| <b>Formosa</b>                |                               |                                  |                           |                             |                                                             |
| Abu                           | x                             |                                  |                           |                             | Resting indoors                                             |
| <b>Bubaque</b>                |                               |                                  |                           |                             |                                                             |
| Bubaque                       | x                             |                                  |                           |                             | Larvae in roadside pool at hospital entrance, no vegetation |
| Brus                          | x                             |                                  |                           |                             | Roadside pool, vegetation on three sides                    |
| <b>Orango</b>                 |                               |                                  |                           |                             |                                                             |
| Orango                        | x                             |                                  |                           |                             | Flying on hotel patio at sunset (sweep net collection)      |
| Eticoga                       | x                             |                                  |                           |                             | Swamp                                                       |

**Table S2:** Location and habitat characteristics of *Aedes* and other genera on the Bijagós archipelago.

| Village and town<br>Location  | <i>Aedes aegypti</i> | <i>Aedes luteocephalus</i> | <i>Aedes mixtus</i> | <i>Aedes vittatus</i> | <i>Mansonia africana</i> | <i>Mansonia uniformis</i> | Notes                                                       |
|-------------------------------|----------------------|----------------------------|---------------------|-----------------------|--------------------------|---------------------------|-------------------------------------------------------------|
| <b>Mainland Guinea Bissau</b> |                      |                            |                     |                       |                          |                           |                                                             |
| Antula                        |                      |                            | x                   |                       |                          |                           | Resting indoors                                             |
| Prabis                        |                      |                            |                     |                       | x                        | x                         | Resting indoors                                             |
| <b>Formosa</b>                |                      |                            |                     |                       |                          |                           |                                                             |
| Abu                           | x                    |                            |                     |                       |                          |                           | Resting indoors                                             |
| <b>Bubaque</b>                |                      |                            |                     |                       |                          |                           |                                                             |
| Bubaque                       |                      |                            |                     | x                     |                          |                           | Larvae in roadside pool at hospital entrance, no vegetation |
| <b>Orango</b>                 |                      |                            |                     |                       |                          |                           |                                                             |
| Orango                        | x                    | x                          |                     |                       |                          |                           | Flying on hotel patio at sunset (sweep net collection)      |
| Orango                        |                      | x                          |                     |                       |                          |                           | Pot plants holding water                                    |

**Table S3:** Location and habitat characteristics of *Culex* and other genera on the Bijagós archipelago.

| Village and town<br>Location  | <i>Culex antennatus</i> | <i>Culex decens</i> | <i>Culex invidiosus</i> | <i>Culex neavei</i> | <i>Culex nebulosus</i> | <i>Culex quinquefasciatus</i> | <i>Culex rima</i> | <i>Culex wiggelsworthi</i> | <i>Eretmapodites quinquevittatus</i> | <i>Coquillettidia aurites</i> | Notes                                                       |
|-------------------------------|-------------------------|---------------------|-------------------------|---------------------|------------------------|-------------------------------|-------------------|----------------------------|--------------------------------------|-------------------------------|-------------------------------------------------------------|
| <b>Mainland Guinea Bissau</b> |                         |                     |                         |                     |                        |                               |                   |                            |                                      |                               |                                                             |
| Antula                        |                         | x                   |                         |                     | x                      | x                             | x                 | x                          |                                      |                               | Resting indoors                                             |
| Prabis                        |                         | x                   |                         | x                   | x                      | x                             |                   |                            |                                      |                               | Resting indoors                                             |
| <b>Formosa</b>                |                         |                     |                         |                     |                        |                               |                   |                            |                                      |                               |                                                             |
| Abu                           |                         |                     |                         |                     |                        |                               |                   |                            |                                      |                               | Resting indoors                                             |
| <b>Bubaque</b>                |                         |                     |                         |                     |                        |                               |                   |                            |                                      |                               |                                                             |
| Bubaque                       |                         | x                   | x                       |                     |                        |                               |                   |                            |                                      |                               | Larvae in roadside pool at hospital entrance, no vegetation |
| Bubaque                       |                         |                     |                         |                     | x                      | x                             |                   |                            | x                                    | x                             | Resting in tall grass under trees                           |
| Bubaque                       | x                       |                     |                         |                     |                        |                               |                   |                            |                                      |                               | Small container in the sun filled with water                |
| Brus                          |                         |                     |                         |                     | x                      |                               |                   |                            |                                      |                               | Resting indoors                                             |



**Table S4:** Location and habitat characteristics of *Aedes* mosquitoes collected in Comoros islands.

| Village and town Location            | <i>Aedes aegypti</i> | <i>Aedes albopictus</i> | <i>Aedes bromeliae</i> | <i>Aedes m, onettus</i> | <i>Aedes fowleri</i> | <i>Aedes vittatus</i> | <i>Aedes cartroni</i> | Notes                                                                                   |
|--------------------------------------|----------------------|-------------------------|------------------------|-------------------------|----------------------|-----------------------|-----------------------|-----------------------------------------------------------------------------------------|
| <b>Grande Comore</b>                 |                      |                         |                        |                         |                      |                       |                       |                                                                                         |
| Moroni                               | X                    |                         | X <sup>1</sup>         |                         |                      |                       |                       | Water bottle nestled in between leaves of large agave                                   |
| Moroni                               | X                    |                         | X                      |                         |                      |                       |                       | Coconut shell                                                                           |
| Moroni                               |                      |                         | X                      |                         |                      |                       |                       | Leaf axils of a variegated colored cotyledon.                                           |
| Moroni                               | X                    |                         | X                      |                         |                      |                       |                       | Pineapple plant leaf axils                                                              |
| Boenindi                             | X                    |                         |                        |                         |                      |                       |                       | Concrete cistern                                                                        |
| Ossivo                               |                      |                         |                        |                         |                      | X                     |                       | Concrete cistern                                                                        |
| Half way between Moroni and Boenindi |                      |                         |                        |                         | X                    |                       |                       | Vernal pool with short grass and sedges and red soil substrate                          |
| Mutsamudu                            |                      |                         |                        |                         |                      | X                     |                       | Concrete floor of partially built house                                                 |
| Malé                                 |                      |                         |                        |                         | X                    | X                     |                       | Mountain stream with filamentous algae, rocks and sand                                  |
| Moroni                               |                      |                         |                        |                         | X                    | X                     |                       | Pools of water in mountain stream, rocky substrate and sandy leave filled pools as well |
| Moroni                               | X                    |                         |                        |                         |                      |                       |                       | Larvae in concrete building block filled with water                                     |
| Moroni                               | X                    |                         | X                      |                         |                      | X                     |                       | Flying around ankles in hotel gardens                                                   |
| <b>Anjouan</b>                       |                      |                         |                        |                         |                      |                       |                       |                                                                                         |
| Mutsamudu                            | X                    | X <sup>2</sup>          | X                      | X                       |                      |                       |                       | Sweep netting through vegetation in grounds of hotel during the day                     |
| Assimpao                             |                      |                         |                        |                         |                      |                       | X                     | Polluted river mouth, some vegetation and rubbish                                       |
| Mutsamudu                            |                      |                         |                        |                         |                      | X                     |                       | Tire                                                                                    |
| Domino                               |                      |                         |                        |                         |                      | X                     |                       | Muddy roadside pool, no vegetation                                                      |
| North of Hohoja                      | X                    |                         |                        |                         |                      |                       |                       | Tree hole- Ylang Ylang plantation                                                       |
| South of Hohoja                      |                      |                         |                        |                         |                      |                       | X                     | Large plastic container                                                                 |
| <b>Moheli</b>                        |                      |                         |                        |                         |                      |                       |                       |                                                                                         |
| Wanani                               |                      |                         |                        |                         |                      | X                     |                       | Muddy shallow pool on edge of soccer field                                              |
| Ndremeani                            |                      |                         |                        |                         | X                    | X                     |                       | Roadside pool, no vegetation                                                            |
| Wala                                 |                      |                         |                        |                         |                      |                       | X                     | River mouth, might be brackish, very muddy                                              |
| Miringoni                            |                      |                         |                        |                         |                      |                       | X                     | Slow moving mountain stream pools, village huts next to stream                          |
| Fomboni                              |                      |                         | X                      |                         |                      |                       |                       | Flying around on patio of hotel                                                         |

<sup>1</sup> Careful examination of mosquitoes collected resembling members of the *Aedes simpsoni* complex revealed that all had leg banding patterns within the range established by Huang (1979) to be that of *Aedes (Steg.) bromeliae* Theobald.

<sup>2</sup> Several female and males of *Aedes (Steg.) albopictus* were collected resting in the vegetation of Hotel Al Amal in the town of Mutsamuda (Anjouan). *Aedes albopictus* were first recorded as having invaded the Comoros Island archipelago by Girod (2004) on Mayotte Island in 2001. Anjouan is the closest of the three islands we assessed to Mayotte from which this mosquitoes likely invaded and established since 2001. This is the first record of this species which is a vector of arboviruses including Dengue fever (Calisher et al. 1981) and Chikungunya (Delatte et al. 2008) on the island of Anjouan.

**Table S5:** Location and habitat characteristics of *Culex* mosquitoes collected in Comoros islands.

| Location                             | <i>Culex comorensis</i> | <i>Culex decens</i> | <i>Culex simpsoni</i> | <i>Culex ethiopicus</i> | <i>Culex sunyaniensis</i> like | <i>Culex quinquefasciatus</i> | <i>Culex</i> unknown | Notes                                                                                   |
|--------------------------------------|-------------------------|---------------------|-----------------------|-------------------------|--------------------------------|-------------------------------|----------------------|-----------------------------------------------------------------------------------------|
| <b>Grande Comore</b>                 |                         |                     |                       |                         |                                |                               |                      |                                                                                         |
| Moroni                               |                         |                     | X                     |                         |                                | X                             |                      | Water bottle caught in between leaves of large agave                                    |
| Boenindi                             |                         |                     | X                     |                         |                                |                               |                      | Concrete cistern                                                                        |
| Boenindi                             |                         |                     |                       |                         |                                | X                             |                      | 50 gallon drum indoors                                                                  |
| Ossivo                               |                         |                     | X                     |                         |                                | X                             |                      | Concrete cistern                                                                        |
| Half way between Moroni and Boenindi |                         |                     | X                     |                         |                                |                               |                      | Vernal pool with short grass and sedges and red soil substrate                          |
| Bouni                                |                         |                     |                       |                         |                                | X                             |                      | Concrete cistern                                                                        |
| Mutsamudo                            |                         | X                   | X                     |                         |                                | X                             |                      | Broken Cistern with grass and sedge on edges                                            |
| Mutsamudu                            |                         |                     | X                     |                         |                                | X                             |                      | Concrete floor of partially built house                                                 |
| Malé                                 |                         | X                   |                       |                         |                                |                               |                      | Mountain stream with filamentous algae, rocks and sand                                  |
| Moroni                               | X                       | X                   |                       |                         |                                | X                             |                      | Pools of water in mountain stream, rocky substrate and sandy leave filled pools as well |
| <b>Anjouan</b>                       |                         |                     |                       |                         |                                |                               |                      |                                                                                         |
| Assimpao                             |                         |                     | X                     |                         | X <sup>1</sup>                 | X                             |                      | Polluted river mouth, some vegetation and rubbish                                       |
| 2km north of Assimpao                |                         | X                   | X                     |                         |                                |                               |                      | Roadside ditch with short grassy vegetation all around                                  |
| Simo                                 | X                       | X                   | X                     |                         |                                |                               | X                    | Mountain stream, muddy in appearance, steep embankment, no vegetation                   |
| Chandrè                              | x                       | x                   |                       |                         |                                |                               |                      | Mountain stream pool, small sandy bottom                                                |
| Tsembehou                            | X                       |                     |                       |                         |                                |                               |                      | Mountain stream pool, large rocky and sandy substrates                                  |
| Outskirts of town of Mutsamudu       |                         |                     |                       |                         |                                | X                             |                      | Tire                                                                                    |
| Bambao-Mtsanga                       |                         |                     | X                     | X                       |                                |                               |                      | Marshy area with vegetation created by leaking aquifer                                  |
| Moya                                 |                         |                     | X                     |                         |                                |                               |                      | Shady mountain stream pool with rocky and sandy substrate some submerged vegetation     |
| Moya                                 |                         |                     | X                     |                         |                                |                               |                      | Swampy vernal pool, large, much submerged vegetation and detritus                       |
| Sadapoini                            |                         | X                   | X                     |                         |                                |                               |                      | Mountain stream pool, muddy water                                                       |
| <b>Moheli</b>                        |                         |                     |                       |                         |                                |                               |                      |                                                                                         |
| Wala                                 |                         |                     | X                     |                         |                                |                               |                      | River mouth, might be brackish, very muddy                                              |
| Fomboni                              |                         |                     | X                     |                         |                                |                               |                      | Muddy pools in town.                                                                    |
| Miringoni                            |                         |                     | X                     |                         |                                | X                             |                      | Slow moving mountain stream pools, village huts next to stream                          |
| A few kilometers north of Miringoni  | X                       |                     |                       |                         |                                |                               |                      | Small deep mountain stream                                                              |
| Fomboni                              |                         |                     |                       |                         |                                | X                             |                      | Flying around ankles on Hotel patio                                                     |

<sup>1</sup> A single larva collected at Assimpao was reared to an adult male. The larval pelt characters resembled *Culex (Eum.) sunyaniensis* Edwards in all aspects. These included presence of an unpaired mid ventral tuft proximal to the multi-branched paired tufts in the barred area, subventral tufts shorter than width of siphon and non spiculated distal margin of saddle. All these characters distinguish this species from larvae of closely related *Culex (Eum.) wigglesworthi* Edwards which has subventral tufts longer than the width of the siphon, spiculated saddle margin and three small unpaired ventral tufts outside barred area (Hopkins 1952). Adult male however, keyed out as *Cx. wigglesworthi* because of a large patch of white erect head scales (Edwards 1941) and shape and numbers of appendages on basal lobe of male coxite (Hamon and Rickenbach 1955). This is the first record of either of these species occurring in the Comoro Islands.

**Table S6:** Location and habitat characteristics of *Anopheles* mosquitoes collected in Comoros islands.

| Location             | <i>Anopheles gambiae</i> | <i>Anopheles pretoriensis</i> | <i>Anopheles coustani</i> | <i>Anopheles</i> unknown | Notes                                                                               |
|----------------------|--------------------------|-------------------------------|---------------------------|--------------------------|-------------------------------------------------------------------------------------|
| <b>Grande Comore</b> |                          |                               |                           |                          |                                                                                     |
| Boenindi             | X                        |                               |                           |                          | Concrete cistern                                                                    |
| Boenindi             | X                        |                               |                           |                          | 50 gallon drum indoors                                                              |
| Ossivo               | X                        | X                             |                           |                          | Concrete cistern                                                                    |
| Bouni                | X                        |                               |                           |                          | Concrete cistern                                                                    |
| Mutsamudu            | X                        | X                             |                           |                          | Concrete floor of partially built house                                             |
| Malé                 | X                        |                               |                           |                          | Large water filled depression between village houses                                |
| Malé                 | X                        | X                             |                           |                          | Mountain stream with filamentous algae, rocks and sand                              |
| <b>Anjouan</b>       |                          |                               |                           |                          |                                                                                     |
| Assimpao             |                          | X <sup>1</sup>                |                           |                          | Polluted river mouth, some vegetation and rubbish                                   |
| Assimpao             | X                        | X                             |                           |                          | Roadside ditch with short grassy vegetation all around                              |
| Tsembehou            |                          | X                             |                           |                          | Mountain stream pool, large rocky and sandy substrates                              |
| Bambao-Mtsanga       |                          | X                             |                           | X <sup>2</sup>           | Marshy area with vegetation created by leaking aquifer                              |
| Moya                 |                          | X                             |                           |                          | Shady mountain stream pool with rocky and sandy substrate some submerged vegetation |
| Moya                 | X                        |                               |                           |                          | Swampy vernal pool, large, much submerged vegetation and detritus                   |
| Sadapoini            |                          | X                             |                           |                          | Mountain stream pool, muddy water                                                   |
| Hohoja               |                          | X                             |                           |                          | Mountain stream pool near river mouth, sandy and rocky substrates                   |
| <b>Moheli</b>        |                          |                               |                           |                          |                                                                                     |
| Wanani               | X                        |                               |                           |                          | Muddy shallow pool on edge of soccer field                                          |
| Ndremani             | X                        | X                             |                           |                          | Roadside pool, no vegetation                                                        |
| Wala                 | X                        |                               |                           |                          | River mouth, might be brackish, very muddy                                          |
| Fomboni              | X                        |                               |                           |                          | Muddy pools in town.                                                                |
| Hoani                | X                        | X                             |                           |                          | Roadside pools, muddy, no vegetation                                                |
| Miringoni            | X                        | X                             | X                         |                          | Slow moving mountain stream pools, village huts next to stream                      |

<sup>1</sup> Wing pale markings of *Anopheles pretoriensis* originating from all three islands consistently varied slightly from that described by Gillies and DeMeillon (1968) (Figure S1).

<sup>2</sup> Unknown *Anopheles* species. A single female reared from a pupa collected in the swamp could be keyed out in Gillies and DeMeillon (1968) or in Gillies and Coetzee (1987). The specimen is a small *Anopheles* that does not key out beyond couplet 7 (section IX) in Gillies and Coetzee (1987) because of the apical pale banding patterns that are very small and indistinct on mid and hind tarsal segments 1-3 (absent in 4 and 5) and more distinct and broader on tarsal segments 1-3 in the front legs. Wing banding also differs from other mosquitoes in section IX that contains mosquitoes closely resembling the *marshalli* group of mosquitoes.

**Table S7:** Location and habitat characteristics of *Eretmapodites* and other mosquitoes collected in Comoros islands.

| Location                                | <i>Eretmapodites quinquevittatus</i> | <i>Eretmapodites subsimplicipes</i> | <i>Lutzia tigris</i> | Notes                                                             |
|-----------------------------------------|--------------------------------------|-------------------------------------|----------------------|-------------------------------------------------------------------|
| <b>Grande Comore</b>                    |                                      |                                     |                      |                                                                   |
| Moroni, La Moroni Hotel grounds         | X                                    | X                                   |                      | Coconut shell                                                     |
| Ossivo                                  |                                      |                                     | X                    | Concrete cistern                                                  |
| Bouni                                   |                                      |                                     | X                    | Concrete cistern                                                  |
| Mutsamudu                               |                                      |                                     | X                    | Broken Cistern with grass and sedge on edges                      |
| Mutsamudu                               |                                      |                                     | X                    | Concrete floor of partially built house                           |
| Hotel Morini                            | X                                    | X                                   |                      | Flying around ankles in hotel gardens                             |
| <b>Anjouan</b>                          |                                      |                                     |                      |                                                                   |
| Hotel Al Amal grounds, Town of Mutsmudu | X                                    | X                                   |                      | Man biting in grounds of hotel during the day                     |
| Moya                                    |                                      |                                     | X                    | Swampy vernal pool, large, much submerged vegetation and detritus |
| South of Hohoja                         |                                      |                                     | X                    | Large plastic container                                           |
| <b>Moheli</b>                           |                                      |                                     |                      |                                                                   |
| Fomboni                                 | X                                    | X                                   |                      | Flying around ankles on Hotel patio                               |

**Table S8:** Locus specific pairwise  $F_{ST}$  values for Tanzania-Comoros island comparisons, with significant values after Bonferoni correction underlined. SNP names reflect ensemble ID's, and are organized according their chromosomal location (2L=left arm of chromosome 2, 2R=right arm of chromosome 2 etc). SNPs located within inversions are denoted with superscripts, <sup>b</sup>=2Rb, <sup>u</sup>=2Ru, <sup>a</sup>=2La.

|                                  | <b>TNZ-AJ</b>  | <b>TNZ-GC</b>  | <b>TNZ-MH</b>  |
|----------------------------------|----------------|----------------|----------------|
| <b>Ag2L-02422654</b>             | <u>0.96437</u> | <u>0.97394</u> | <u>0.97894</u> |
| <b>Ag2L-02422079</b>             | 0              | <u>0.0791</u>  | 0              |
| <b>Ag2L-01272330</b>             | 0.01511        | 0              | 0.03391        |
| <b>Ag2L-37733999<sup>a</sup></b> | <u>0.26942</u> | <u>0.21809</u> | <u>0.25659</u> |
| <b>Ag2L-39892883<sup>a</sup></b> | <u>0.16241</u> | <u>0.16994</u> | <u>0.16537</u> |
| <b>Ag2L-39996745<sup>a</sup></b> | 0              | 0.00029        | <u>0.17209</u> |
| <b>Ag2L-40902105<sup>a</sup></b> | 0.01511        | 0.02532        | 0.03391        |
| <b>Ag2R-04012275</b>             | <u>0.31338</u> | <u>0.35015</u> | <u>0.44361</u> |
| <b>Ag2R-25147838<sup>b</sup></b> | 0.06277        | <u>0.08849</u> | <u>0.11057</u> |
| <b>Ag2R-27040679</b>             | <u>0.32681</u> | 0.00244        | 0.00755        |
| <b>Ag2R-32389630<sup>u</sup></b> | 0.01888        | <u>0.15585</u> | 0              |
| <b>Ag2R-42820496</b>             | 0.03903        | 0.01914        | 0.03154        |
| <b>Ag2R-50098579</b>             | <u>0.13382</u> | <u>0.13378</u> | 0.05818        |
| <b>Ag2R-56681764</b>             | 0.03903        | 0.05729        | 0.07301        |
| <b>Ag3L-00125286</b>             | <u>0.21352</u> | 0.00281        | <u>0.10022</u> |
| <b>Ag3L-00387649</b>             | 0              | 0              | 0              |
| <b>Ag3L-00670814</b>             | 0              | 0.05523        | <u>0.13413</u> |
| <b>Ag3L-01242464</b>             | 0.0163         | 0              | 0.03984        |
| <b>Ag3L-03093406</b>             | <u>0.20943</u> | <u>0.11915</u> | 0              |
| <b>Ag3L-06551099</b>             | <u>0.18865</u> | 0.00233        | 0.03686        |
| <b>Ag3L-09844638</b>             | 0              | 0.0749         | 0.04889        |
| <b>Ag3L-14050318</b>             | <u>0.09808</u> | <u>0.13391</u> | <u>0.16423</u> |
| <b>Ag3L-41786408</b>             | 0.00309        | <u>0.09499</u> | 0.01375        |
| <b>Ag3R-13897048</b>             | <u>0.27944</u> | 0.10957        | 0.0187         |
| <b>Ag3R-14846418</b>             | 0.00574        | <u>0.192</u>   | 0              |
| <b>Ag3R-28746909</b>             | 0.08295        | <u>0.42492</u> | <u>0.20182</u> |
| <b>Ag3R-38153793</b>             | <u>0.18769</u> | <u>0.10058</u> | 0              |
| <b>Ag3R-48194942</b>             | 0.05464        | 0.03687        | 0.02455        |
| <b>AgX-18983531</b>              | 0.00486        | 0              | 0              |
| <b>AgX-21772730</b>              | 0.00064        | <u>0.40107</u> | 0              |
| <b>AgX-22817756</b>              | 0.03903        | 0.05729        | 0.07301        |

**Table S9:** Frequency of full length ND5 haplotypes by sampling location. Three letter codes correspond with Table 1 and Figure 2.

| Accession | Haplotype | Haplotype Frequency |                 |         |        |     |     |
|-----------|-----------|---------------------|-----------------|---------|--------|-----|-----|
|           |           | Mainland            | Comoros islands |         |        |     |     |
|           |           | Tanzania            | Grande Comore   | Anjouan | Moheli |     |     |
|           |           | DAR                 | BOE             | BOU     | MOY    | WAL | WAN |
| KC249505  | ISL01     |                     | 21              | 6       |        |     |     |
| KC249506  | ISL02     | 4                   | 10              | 25      | 23     |     |     |
| KC249507  | ISL03     |                     |                 |         | 6      | 26  | 28  |
| KC249508  | ISL04     |                     |                 |         | 1      |     |     |
| KC249509  | ISL05     |                     |                 |         |        | 2   |     |
| KC249510  | ISL06     |                     |                 |         |        | 1   | 2   |
| KC249511  | ISL07     | 3                   |                 |         |        |     |     |
| KC249512  | ISL08     | 3                   |                 |         |        |     |     |
| KC249513  | ISL09     | 6                   |                 |         |        |     |     |
| KC249514  | ISL10     | 1                   |                 |         |        |     |     |
| KC249515  | ISL11     | 4                   |                 |         |        |     |     |
| KC249516  | ISL12     | 10                  |                 |         |        |     |     |
| KC249517  | ISL13     | 1                   |                 |         |        |     |     |

**Table S10:** Haplotype numbers from Figure S4 and their corresponding haplotype designations by Besansky and Genbank accession numbers.

| <b>Figure S4<br/>H#</b> | <b>H# from<br/>Besansky</b> | <b>Genbank accession #</b> |
|-------------------------|-----------------------------|----------------------------|
| 1                       | 1                           | AF020965*                  |
| *                       | 2                           | AF020966*                  |
| 2                       | 3                           | AF020967                   |
| 3                       | 11                          | AF020975                   |
| 4                       | 14                          | AF020978                   |
| 5                       | 31                          | AF020995                   |
| 6                       | 32                          | AF020996                   |
| 7                       | 33                          | AF020997                   |
| 8                       | 35                          | AF020999                   |
| 9                       | 36                          | AF021000                   |
| 10                      | 37                          | AF021001                   |
| 11                      | 41                          | AF021005                   |
| 12                      | 42                          | AF021006                   |
| 13                      | 43                          | AF021007                   |
| 14                      | 47                          | AF021011                   |
| 15                      | 48                          | AF021012                   |
| 16                      | 49                          | AF021013                   |
| 17                      | 50                          | AF021014                   |
| 18                      | 51                          | AF021015                   |
| 19                      | 52                          | AF021016                   |
| 20                      | 53                          | AF021017                   |
| 21                      | 54                          | AF021018                   |
| 22                      | 55                          | AF021019                   |
| 23                      | 56                          | AF021020                   |
| 24                      | 57                          | AF021021                   |
| 25                      | 58                          | AF021022                   |
| 26                      | 59                          | AF021023                   |
| 27                      | 62                          | AY312092                   |
| 28                      | 63                          | AY312093                   |
| 29                      | 65                          | AY312094                   |
| 30                      | 67                          | AY312096                   |
| 31                      | 68                          | AY312097                   |
| 32                      | 75                          | AY312104                   |
| 33                      | 76                          | AY312105                   |
| 34                      | 78                          | AY312107                   |
| 35                      | 80                          | AY312109                   |
| 36                      | 81                          | AY312110                   |
| 37                      | 82                          | AY312111                   |

|    |               |          |
|----|---------------|----------|
| 38 | 83            | AY312112 |
| 39 | 87            | AY312116 |
| 40 | 90            | AY312119 |
| 41 | 93            | AY312122 |
| 42 | 94            | AY312123 |
| 43 | 95            | AY312124 |
| 44 | 98            | AY312127 |
| 45 | 100           | AY312129 |
| 46 | 102           | AY312131 |
| 47 | 103           | AY312132 |
| 48 | 107           | AY312136 |
| 49 | 108           | AY312137 |
| 50 | 109           | AY312138 |
| 51 | 110           | AY312139 |
| 52 | 111           | AY312140 |
| 53 | 112           | AY312141 |
| 54 | 113           | AY312142 |
| 55 | ISL04-trimmed | TableS9  |
| 56 | ISL06-trimmed | TableS9  |
| 57 | ISL08-trimmed | TableS9  |
| 58 | ISL10-trimmed | TableS9  |
| 59 | ISL11-trimmed | TableS9  |

\* AF020965 & AF020966 sequences uploaded to GENBANK were identical.



## References

- Besansky, N., T. Lehmann, G. Fahey, D. Fontenille, L. Braack, W. Hawley, and F. Collins. 1997. Patterns of mitochondrial variation within and between African malaria vectors, *Anopheles gambiae* and *An. arabiensis*, suggest extensive gene flow. *Genetics* **147**:1817-1828.
- Calisher, C. H. Nait, M., Laznick J.S., Ferrari, J. D. M., and Kappus, K. D. Dengue in the Seychelles. *Bull. World Hlth. Org.* 1981. 59: 619-622.
- Delatte H., Paupy, C., Dehecq J. S., Thiria, J., Failloux, A. B., Fontenille, D. 2008. *Aedes albopictus*, vector of chikungunya and dengue viruses in Reunion Island :biology and control. *Parasite* 15: 3-13.
- Donnelly, M., M. Licht, and T. Lehmann. 2001. Evidence for recent population expansion in the evolutionary history of the malaria vectors *Anopheles arabiensis* and *Anopheles gambiae*. *Molecular Biology and Evolution* **18**:1353-1364.
- Donnelly, M. J., J. Pinto, R. Girod, N. J. Besansky, and T. Lehmann. 2004. Revisiting the role of introgression vs shared ancestral polymorphisms as key processes shaping genetic diversity in the recently separated sibling species of the *Anopheles gambiae* complex. *Heredity* **92**:61-68.
- Edwards F. W. 1941. Mosquitoes of the Ethiopian Region III. Culicine adults and pupae. British Museum of Natural History, London.
- Gillies M. T and DeMeillon B. 1968. The anophelinae of Africa south of the Sahara. The South African Institute for Medical Research, Johannesburg.
- Gillies M. T and Coetzee, M., 1987. The South African Institute for Medical Research, Johannesburg.
- Girod R. 2004. First record of *Aedes albopictus* in Mayotte Island, Comoros Archipelago. *Parasite* 11: 74
- Hamon J and Rickenbach, A. 1955. Contribution a L'étude des Néoculex (Diptères: Culicidés) de la Région Éthiopienne. 1. Corrections de quelques descriptions de terminalia mâles données par Edwards, avec étude d'une nouvelle variété. *Bull. Soc. De Pathologie exotique.* 48 :6 ; 848-859.
- Hopkins G. H. E. 1952. Mosquitoes of the Ethiopian region I. Larval bionomics of mosquitoes and taxonomy of Culicine larvae. British Museum of Natural History, London.
- Huan, Y. M. 1979. *Aedes (stegomyia) simpsoni* complex in the Ethiopian region with lectotype designation for *simpsoni* (Theobald) (Diptera:Culicidae). *Mosquito Systematics* 11: 221-234.
- Lehmann, T., N. Besansky, W. Hawley, T. Fahey, L. Kamau, and F. Collins. 1997. Microgeographic structure of *Anopheles gambiae* in western Kenya based on mtDNA and microsatellite loci. *Molecular Ecology* **6**:243-253.
